# Supplementary material for: Oral Ferric Maltol Does Not Adversely Affect the Intestinal Microbiome of Patients or Mice, but Ferrous Sulphate Does
Source: MDPI journal article supplement (doi:10.3390/nu13072269), 2021-06-30
Supplement: s1 [file s1]

## Supplementary Tables

**Table S1:** IBD patients who received ferric maltol supplementation. Hb (haemoglobin), CD (Crohn's disease), UC (Ulcerative colitis), SCCAI (Simple Clinical Colitis Activity Index), HBI (Harvey Bradshaw Index), Transferrin Saturation reference range (20%-50%) (41), Ferritin (12-300 ng/ml male, 12-150 ng/ml female).

| Sample ID | Sex | Age | Ethnicity | Type anemia | Hb  | Ferritin | Transferrin saturation | Iron supplement | HBI | Montreal | SCCAI | Diagnosis | Calprotectin |
|-----------|-----|-----|-----------|-------------|-----|----------|------------------------|-----------------|-----|----------|-------|-----------|--------------|
| FM1       | M   | 54  | White     | IDA         | 129 | 16       | 11%                    | ferric maltol   | 3   | A2L4B2   | N/A   | CD        | 29           |
| FM3       | M   | 46  | White     | IDA         | 123 | 7        | 5%                     | ferric maltol   | 2   | A3L2B1p  | N/A   | CD        | 61           |
| FM5       | M   | 47  | White     | IDA         | 105 | 12       | NA                     | ferric maltol   | 0   | A2L3B2   | N/A   | CD        | 118          |
| FM2       | F   | 63  | White     | IDA         | 89  | 11       | 12%                    | ferric maltol   | 2   | A2L2B1   | N/A   | CD        | 263          |
| FM4       | F   | 39  | White     | IDA         | 96  | 6        | NA                     | ferric maltol   | N/A | E3       | 1     | UC        | 407          |
| FM6       | F   | 30  | White     | IDA         | 93  | 10       | 5%                     | ferric maltol   | 0   | A2L3B1   | N/A   | CD        | 68           |

**Table S2:** IDA patients who received ferrous sulphate supplementation. Hb (hemoglobin), Hb 1m (after one month), OGD (Esophagogastroduodenoscopy), GU (gastric ulcer), GORD (Gastro-oesophageal reflux disease), NSAID (nonsteroidal anti-inflammatory drugs).

| Sample ID | Sex | Age | Ethnicity | IDA | Hb   | Hb 1m | Iron supplement  | OGD    | Colonoscopy        | Diagnosis              |
|-----------|-----|-----|-----------|-----|------|-------|------------------|--------|--------------------|------------------------|
| 367       | F   | 48  | White     | IDA | 10.8 | N/A   | ferrous sulphate | GU     | N/A                | GU                     |
| 384       | F   | 71  | White     | IDA | 10.6 | 11.2  | ferrous sulphate | Normal | 2x polyp low grade | 2X (1cm) polyp adenoma |
| 385       | F   | 79  | White     | IDA | 11.6 | 12.1  | ferrous sulphate | GORD   | N/A                | GORD                   |
| 389       | F   | 84  | White     | IDA | 9.5  | 11    | ferrous sulphate | Normal | Cecal Cancer       | Cecal Cancer           |
| 412       | F   | 77  | White     | IDA | 10.9 | 12.5  | ferrous sulphate | Normal | Normal             | None                   |
| 415       | F   | 57  | White     | IDA | 10.3 | 11.1  | ferrous sulphate | GU     | Normal             | GU, NSAID              |
| 355       | M   | 72  | White     | IDA | 11.8 | 12.6  | ferrous sulphate | Normal | N/A                | None                   |
| 388       | M   | 68  | White     | IDA | 11.2 | 12.4  | ferrous sulphate | GORD   | N/A                | GORD                   |
| 392       | M   | 67  | White     | IDA | 10.7 | N/A   | ferrous sulphate | GU     | N/A                | GU                     |
| 401       | M   | 70  | White     | IDA | 11.5 | N/A   | ferrous sulphate | Normal | N/A                | None                   |

**Table S3:** Detail of taxa differential analysis results, including p values and adjusted p values

| Control-d1_vs_FSS-d10_Phylum |             |                |          |          |              |
|------------------------------|-------------|----------------|----------|----------|--------------|
|                              | baseMean    | log2FoldChange | pvalue   | padj     | Upregulated  |
| Verrucomicrobia              | 1883.117817 | -7.67714635    | 3.15E-19 | 2.20E-18 | Control-day1 |

| Control-d1_vs_FMS-d10_Order |
|-----------------------------|
|-----------------------------|

|                 | baseMean   | log2FoldChange | pvalue     | padj        | Upregulated |
|-----------------|------------|----------------|------------|-------------|-------------|
| Lactobacillales | 3645.51595 | 2.001704613    | 0.00262042 | 0.039306262 | FMS-day10   |

| Control-d1_vs_control-d10_Genus |
|---------------------------------|
|---------------------------------|

|                  | baseMean    | log2FoldChange | pvalue     | padj        | Upregulated  |
|------------------|-------------|----------------|------------|-------------|--------------|
| g__Bacteroides   | 3054.422974 | -11.94146817   | 3.60E-66   | 5.40E-65    | Control-day1 |
| g__Lactobacillus | 1102.399724 | -3.336648706   | 8.33E-07   | 6.25E-06    | Control-day1 |
| g__Turicibacter  | 729.9449547 | 3.033064672    | 0.00057368 | 0.002386485 | SC-day10     |

| FSS-d10_vs_FMS-d10_Genus |
|--------------------------|
|--------------------------|

|               | baseMean    | log2FoldChange | pvalue     | padj        | Upregulated |
|---------------|-------------|----------------|------------|-------------|-------------|
| Akkermansia   | 2365.128426 | -8.006601732   | 7.20E-19   | 2.30E-17    | FMS-day10   |
| Bacteroides   | 3686.565685 | -3.190089269   | 1.75E-05   | 0.000280467 | FMS-day10   |
| Ruminococcus  | 630.0125876 | -2.144243411   | 0.00013511 | 0.001441211 | FMS-day10   |
| Lactobacillus | 4427.936757 | -2.364872921   | 0.00030868 | 0.002469413 | FMS-day10   |

|                |             |              |            |             |           |
|----------------|-------------|--------------|------------|-------------|-----------|
| Butyricicoccus | 150.0171607 | -3.276386892 | 0.00099355 | 0.006358712 | FMS-day10 |
| Anaeroplasm    | 2684.707665 | 3.187947881  | 0.0020618  | 0.010996269 | FSS-day10 |
| Turicibacter   | 105.5009155 | 3.275490646  | 0.00254451 | 0.011632042 | FSS-day10 |

Control-d1\_vs\_control-d10\_Genus

|                 | baseMean    | log2FoldChange | pvalue     | padj        | Upregulated |
|-----------------|-------------|----------------|------------|-------------|-------------|
| Butyrivibrio    | 186.4276302 | 7.472710466    | 9.96E-10   | 4.78E-08    | post-FS     |
| Megamonas       | 499.1881487 | 6.945017554    | 1.32E-07   | 3.17E-06    | post-FS     |
| Megasphaera     | 56.95358321 | 5.745317503    | 4.11E-06   | 6.58E-05    | post-FS     |
| Lactobacillus   | 188.5541078 | 4.651070431    | 2.95E-05   | 0.000354097 | post-FS     |
| Acidaminococcus | 22.02842168 | 4.813593187    | 0.00010608 | 0.001018403 | post-FS     |
| Prevotella      | 29.65707943 | 4.647893838    | 0.00016314 | 0.001305124 | post-FS     |
| Unclassified    | 18.19416858 | -4.067673771   | 0.00032026 | 0.002196089 | pre-FS      |
| Turicibacter    | 42.64692706 | -3.161764142   | 0.00218814 | 0.013128841 | pre-FS      |
| Dorea           | 348.8943072 | -2.102518611   | 0.00258127 | 0.013766765 | pre-FS      |
